# Supplementary material for: Squalene emulsion-based vaccine adjuvants stimulate CD8 T cell, but not antibody responses, through a RIPK3-dependent pathway
Source: eLife journal article supplement (doi:10.7554/elife.52687), 2020-06-09

**A**Tetramer<sup>+</sup> CD8

dLN

Spleen

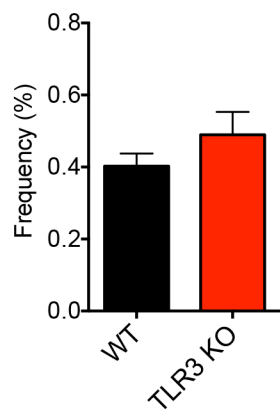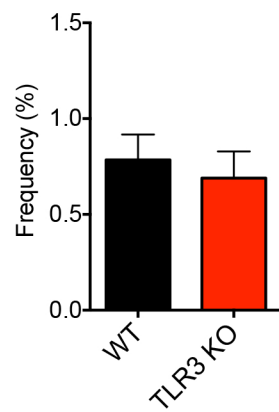**B**Tetramer<sup>+</sup> CD8

dLN

Spleen

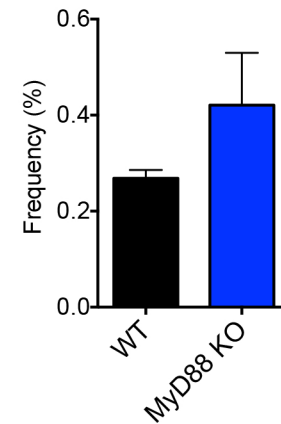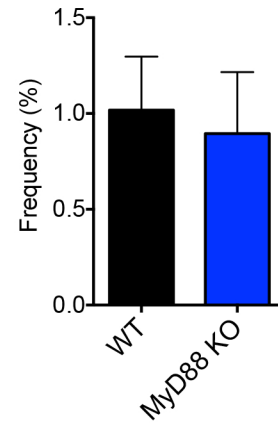

dLN

Spleen

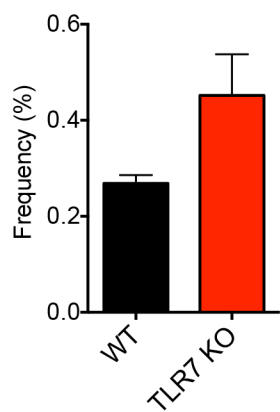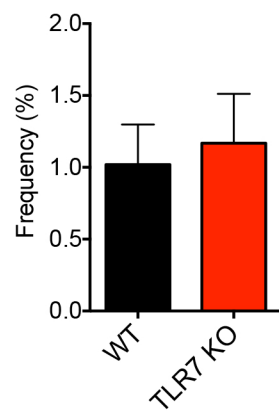

dLN

Spleen

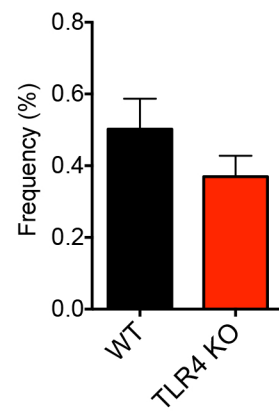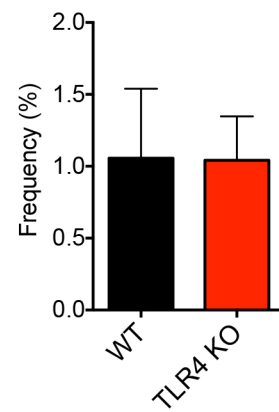

dLN

Spleen

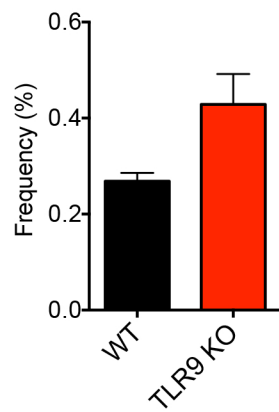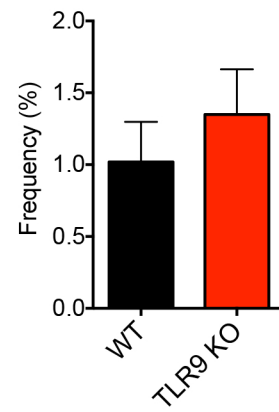

dLN

Spleen

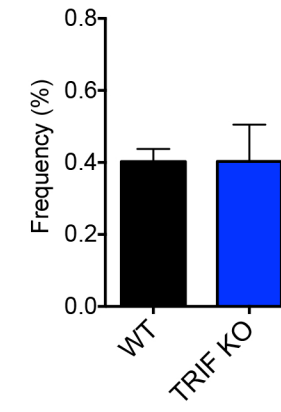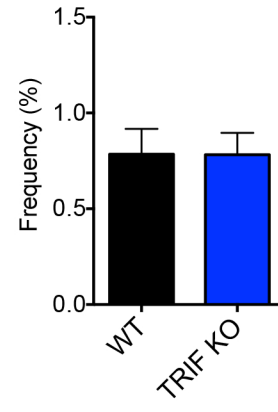**C**Tetramer<sup>+</sup> CD8

dLN

Spleen

Lung

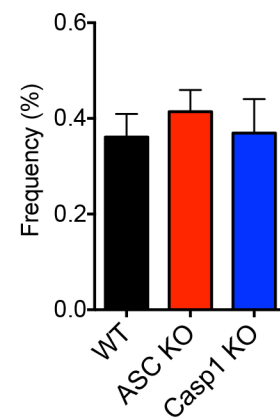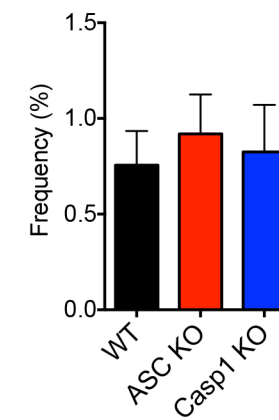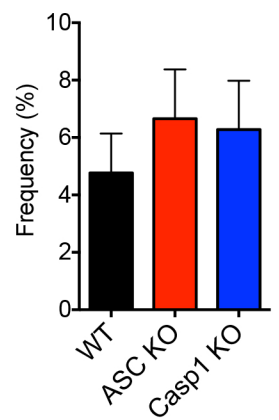**D**Tetramer<sup>+</sup> CD8

dLN

Spleen

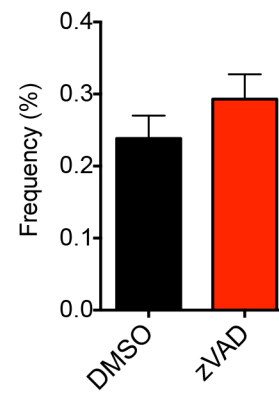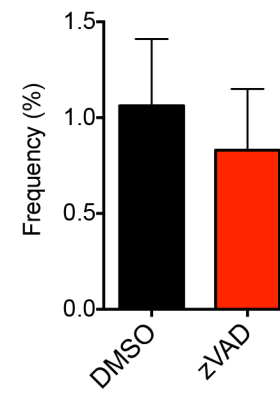

Supplement: supp [file elife_poa_e52687_Figure_6_figure_supplement_1.pdf › elife_poa_e52687_Figure_6_figure_supplement_1.pdf]
