# Supplementary figures and images for: Squalene emulsion-based vaccine adjuvants stimulate CD8 T cell, but not antibody responses, through a RIPK3-dependent pathway
Source: eLife journal article supplement (doi:10.7554/elife.52687), 2020-06-09

**A**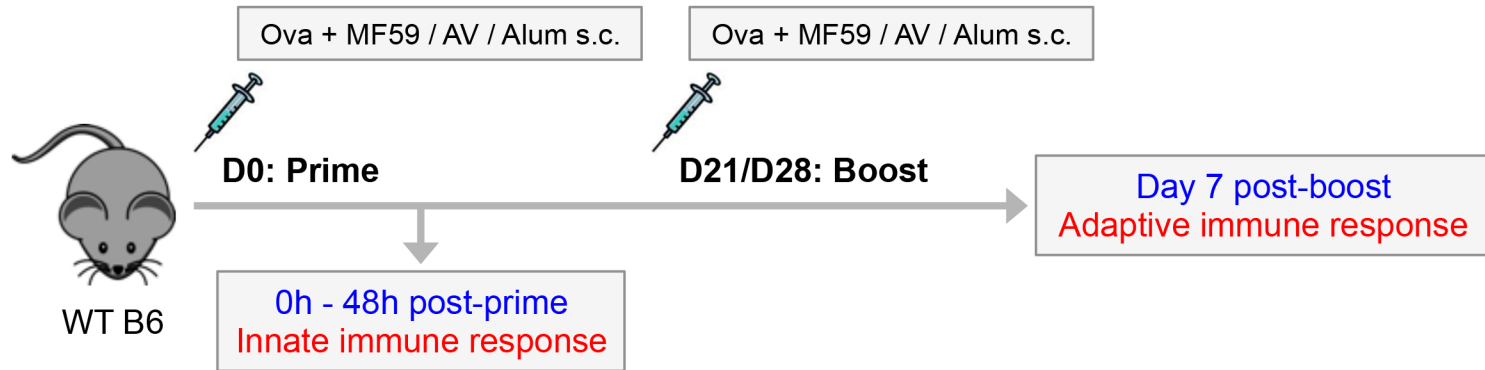**B**

IFN- $\gamma$ <sup>+</sup> CD4 T cell

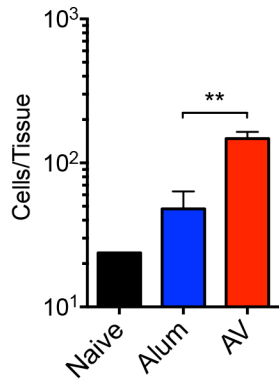

Supplement: supp [file elife_poa_e52687_Figure_1_figure_supplement_1.pdf › elife_poa_e52687_Figure_1_figure_supplement_1.pdf]

**A**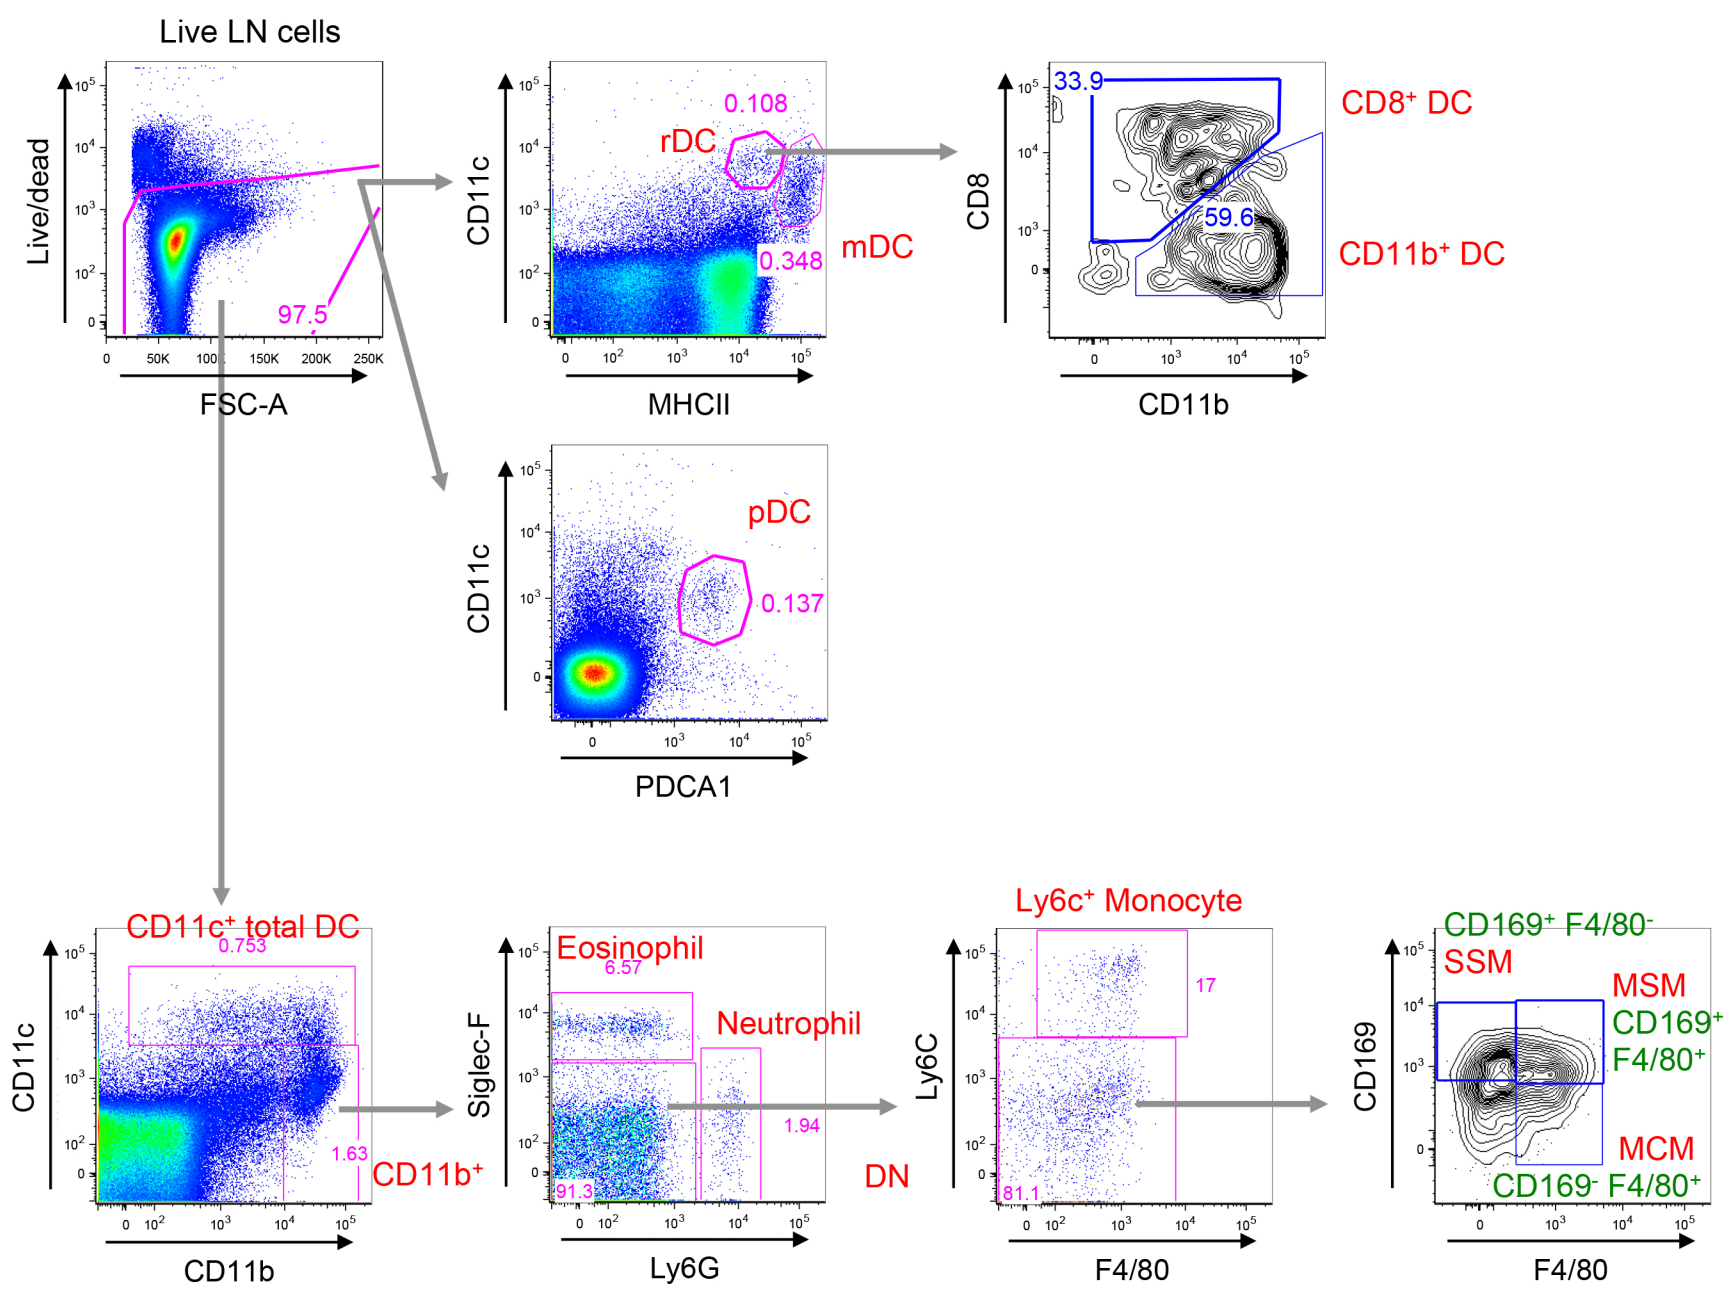**B**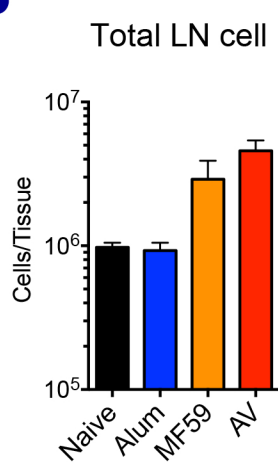**C**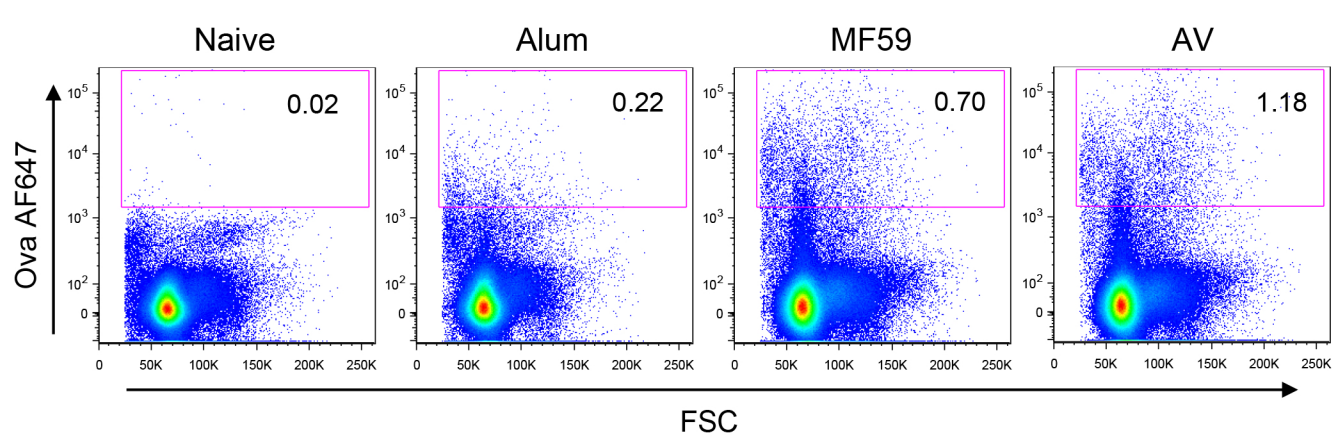**D**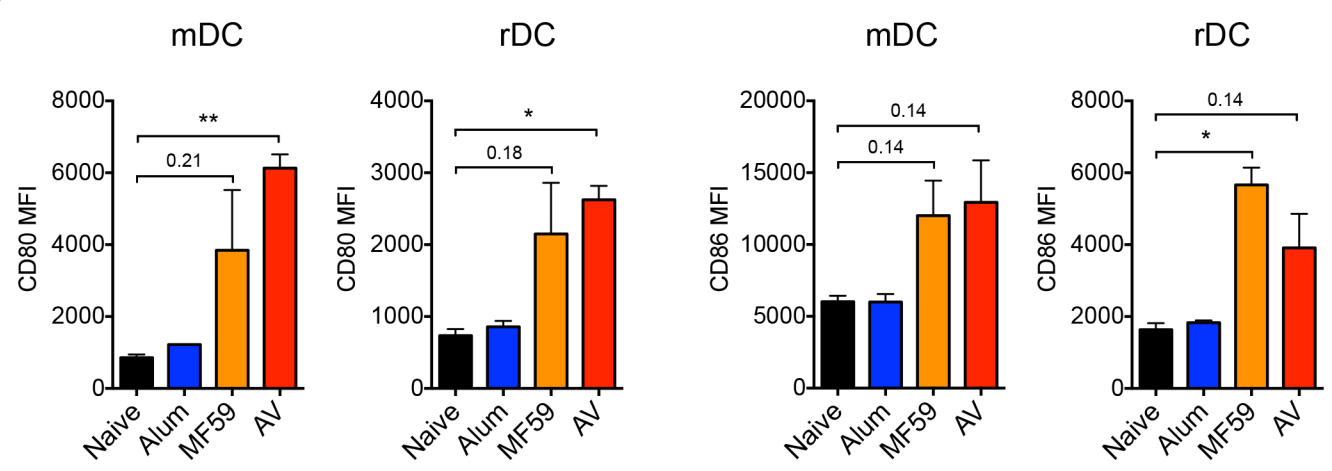

Supplement: supp [file elife_poa_e52687_Figure_2_figure_supplement_1.pdf › elife_poa_e52687_Figure_2_figure_supplement_1.pdf]

**A**

LN: 24h

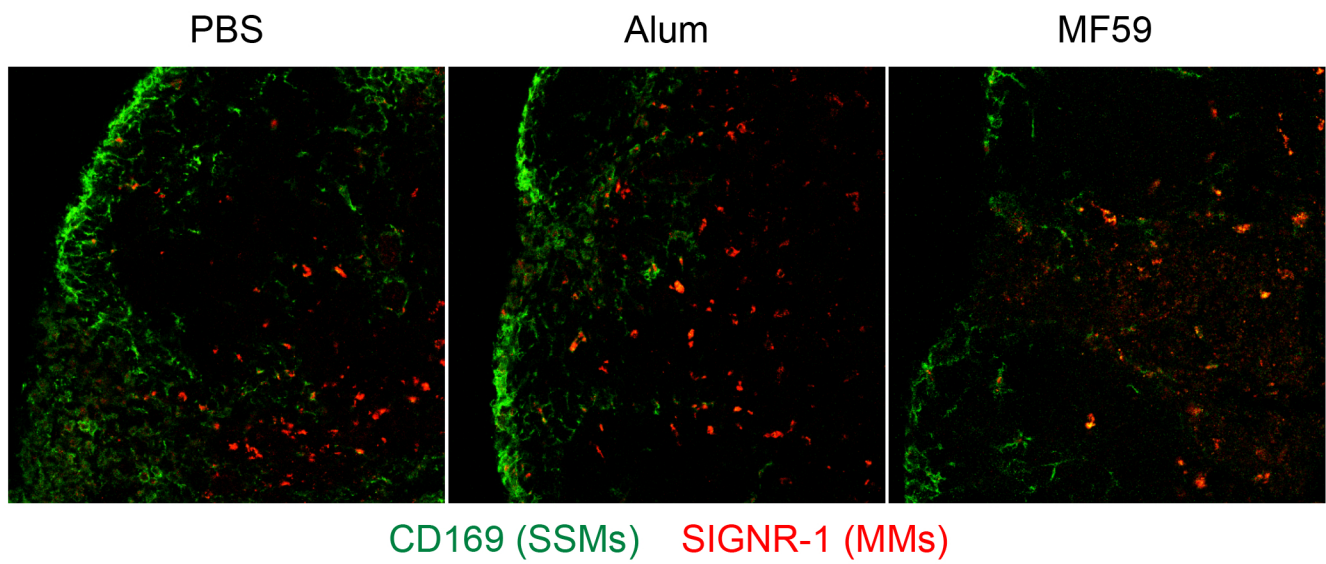**B**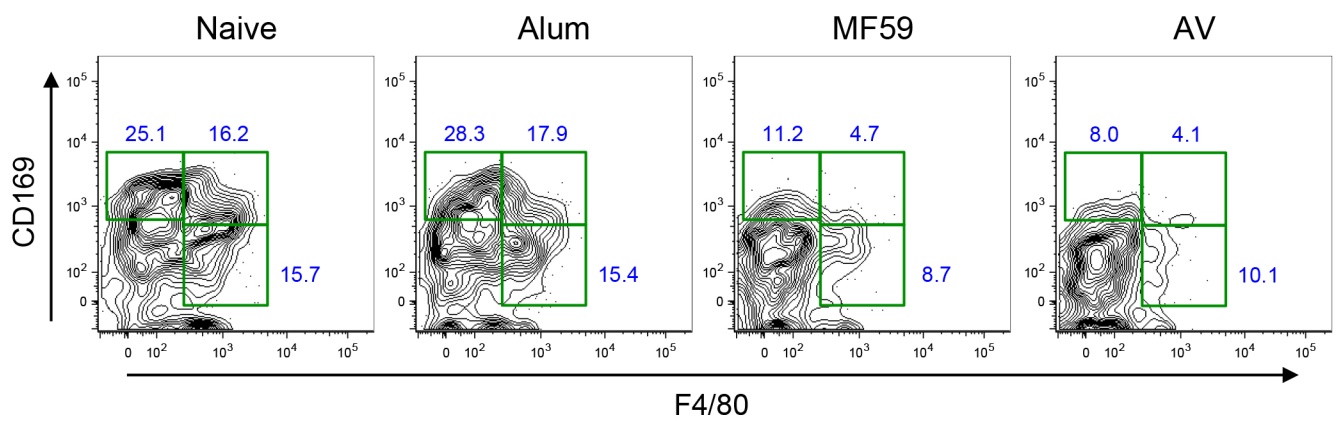**C**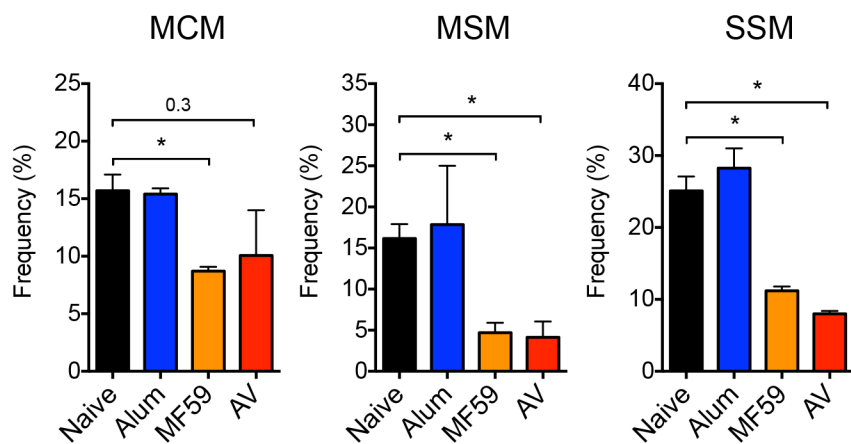**D**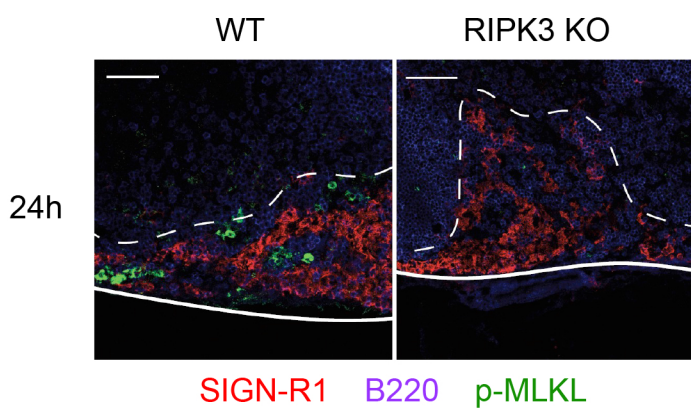**E**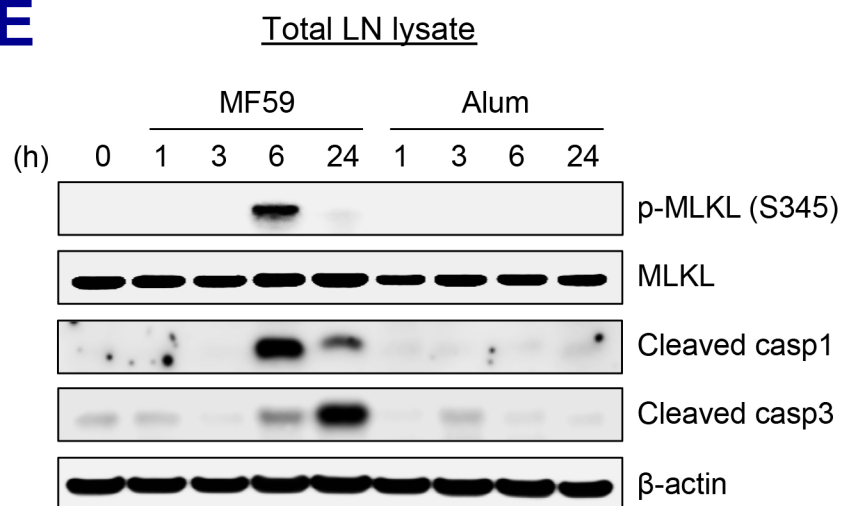

Supplement: supp [file elife_poa_e52687_Figure_3_figure_supplement_1.pdf › elife_poa_e52687_Figure_3_figure_supplement_1.pdf]

**A**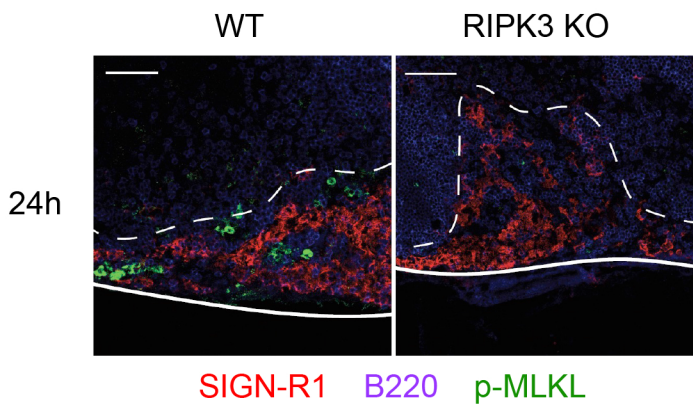**B**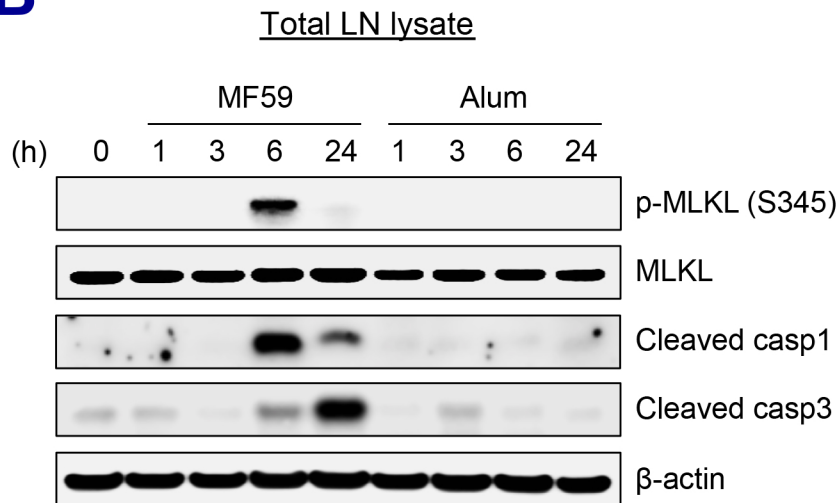**C**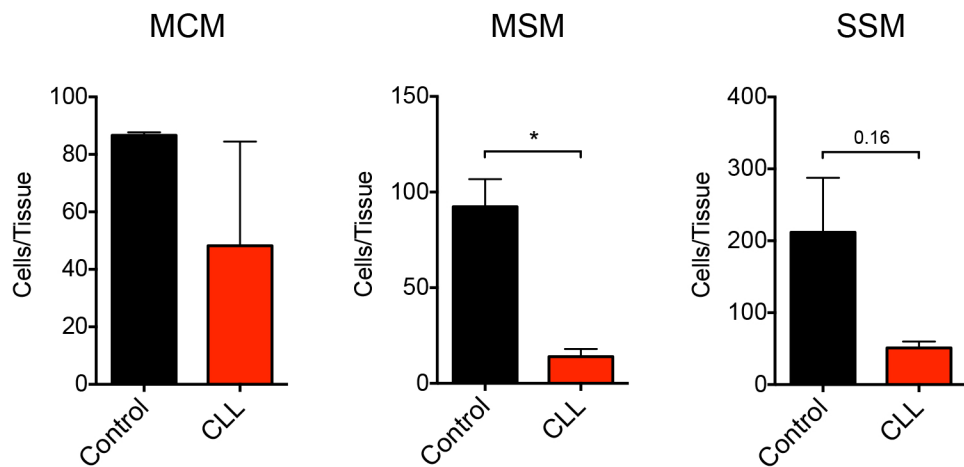

Supplement: supp [file elife_poa_e52687_Figure_4_figure_supplement_1.pdf › elife_poa_e52687_Figure_4_figure_supplement_1.pdf]

**A**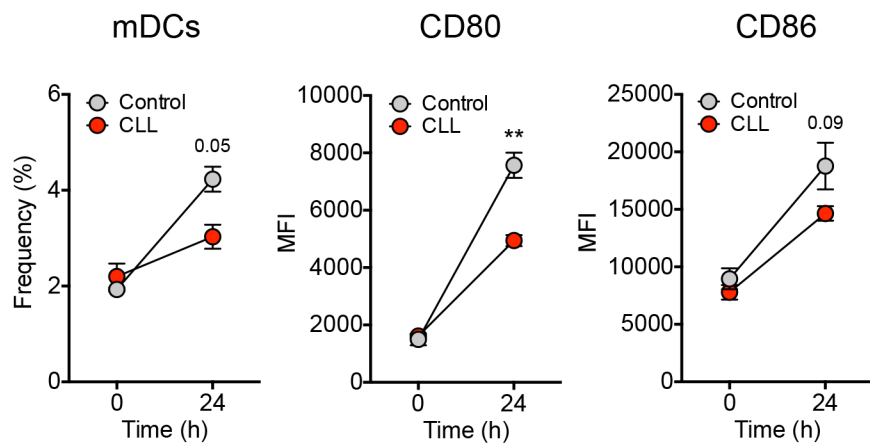**B**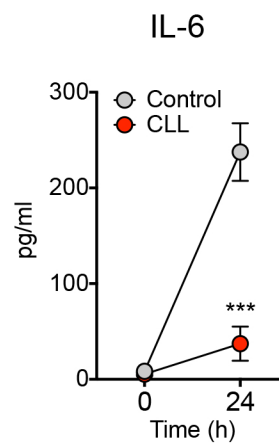**C**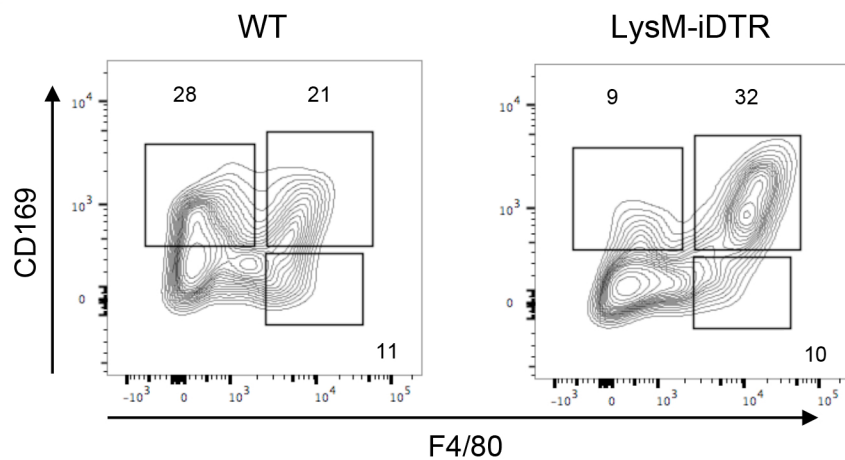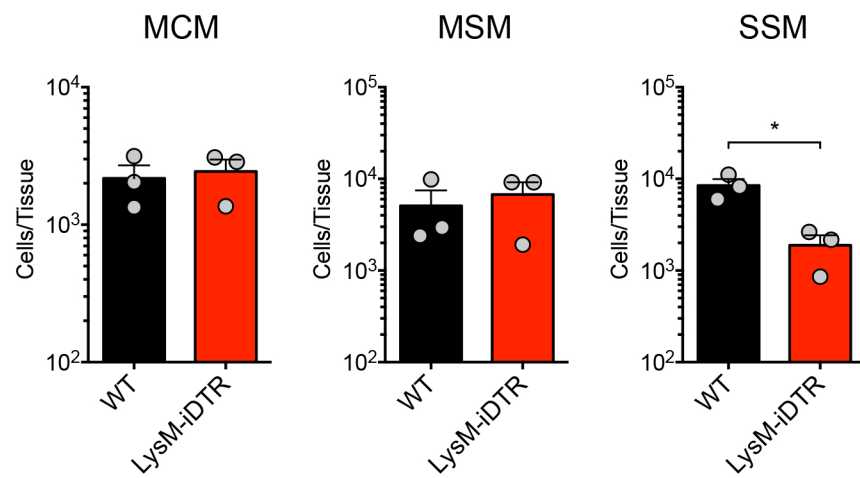**D**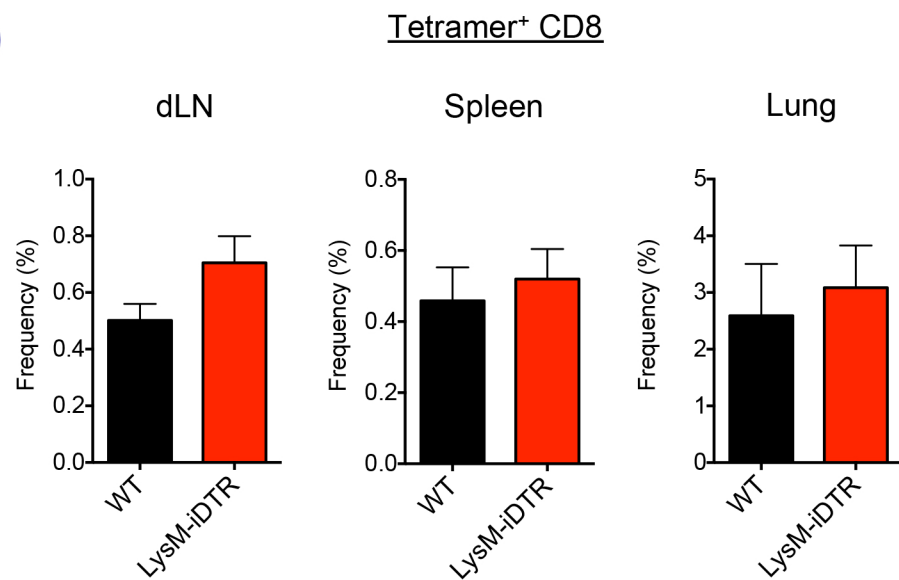**E**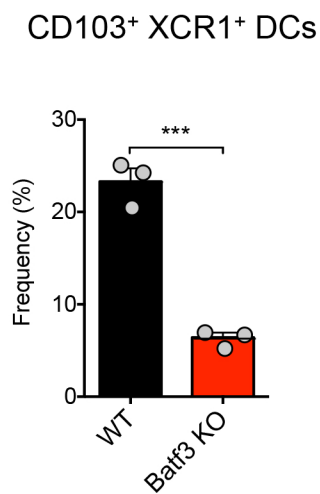

Supplement: supp [file elife_poa_e52687_Figure_5_figure_supplement_1.pdf › elife_poa_e52687_Figure_5_figure_supplement_1.pdf]

**A**

Tetramer<sup>+</sup> CD8

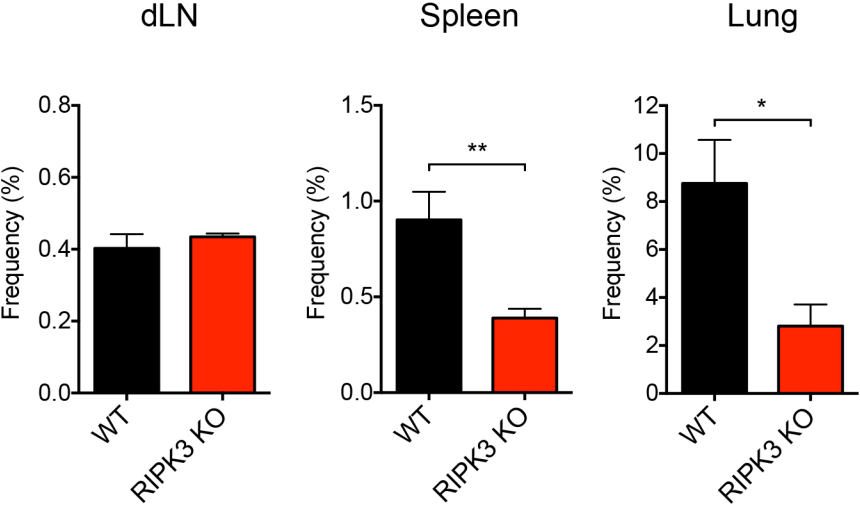**B**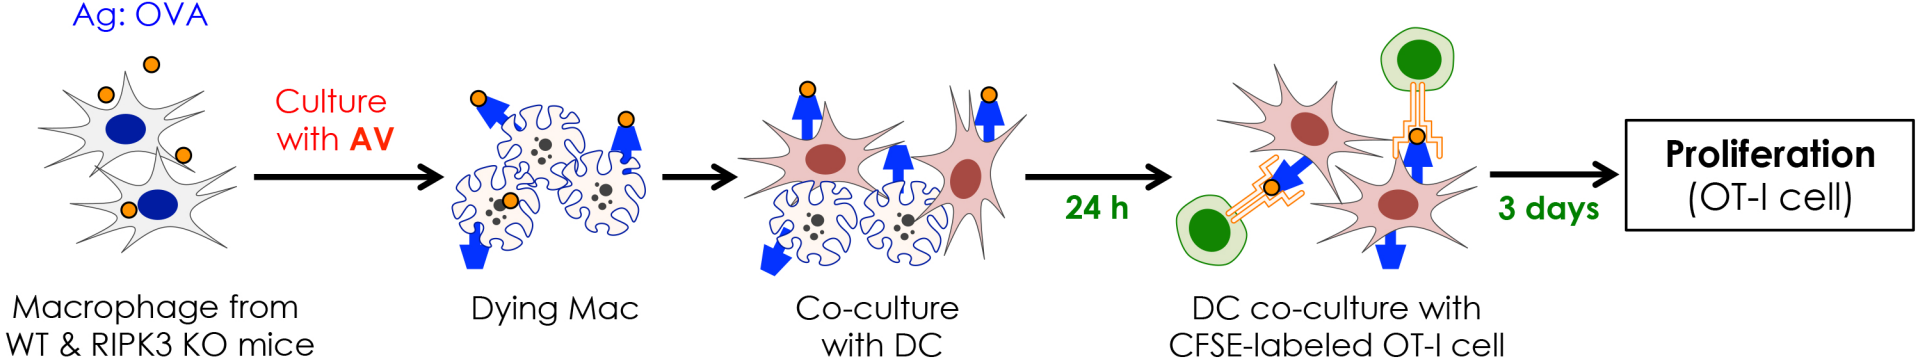

Supplement: supp [file elife_poa_e52687_Figure_6_figure_supplement_2.pdf › elife_poa_e52687_Figure_6_figure_supplement_2.pdf]

**A**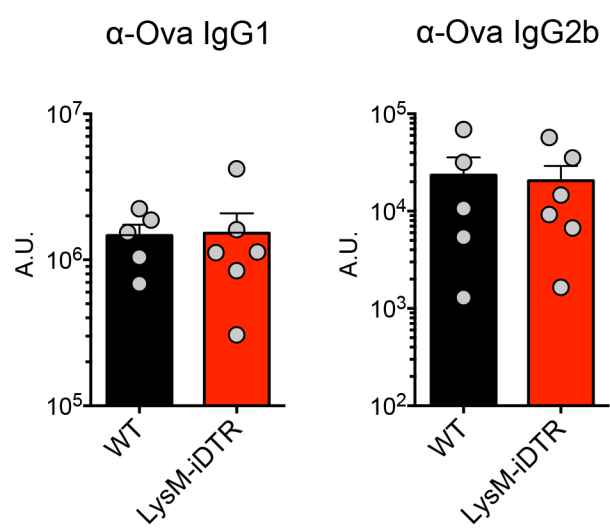**B**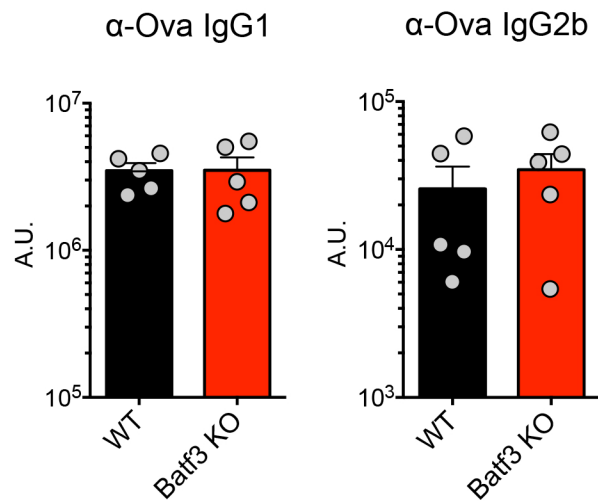**C**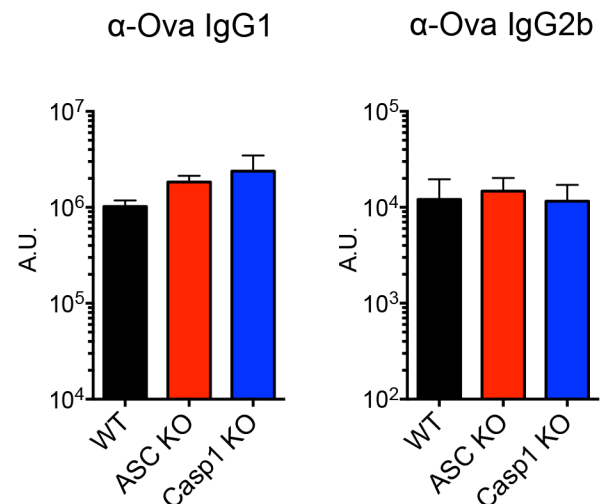**D**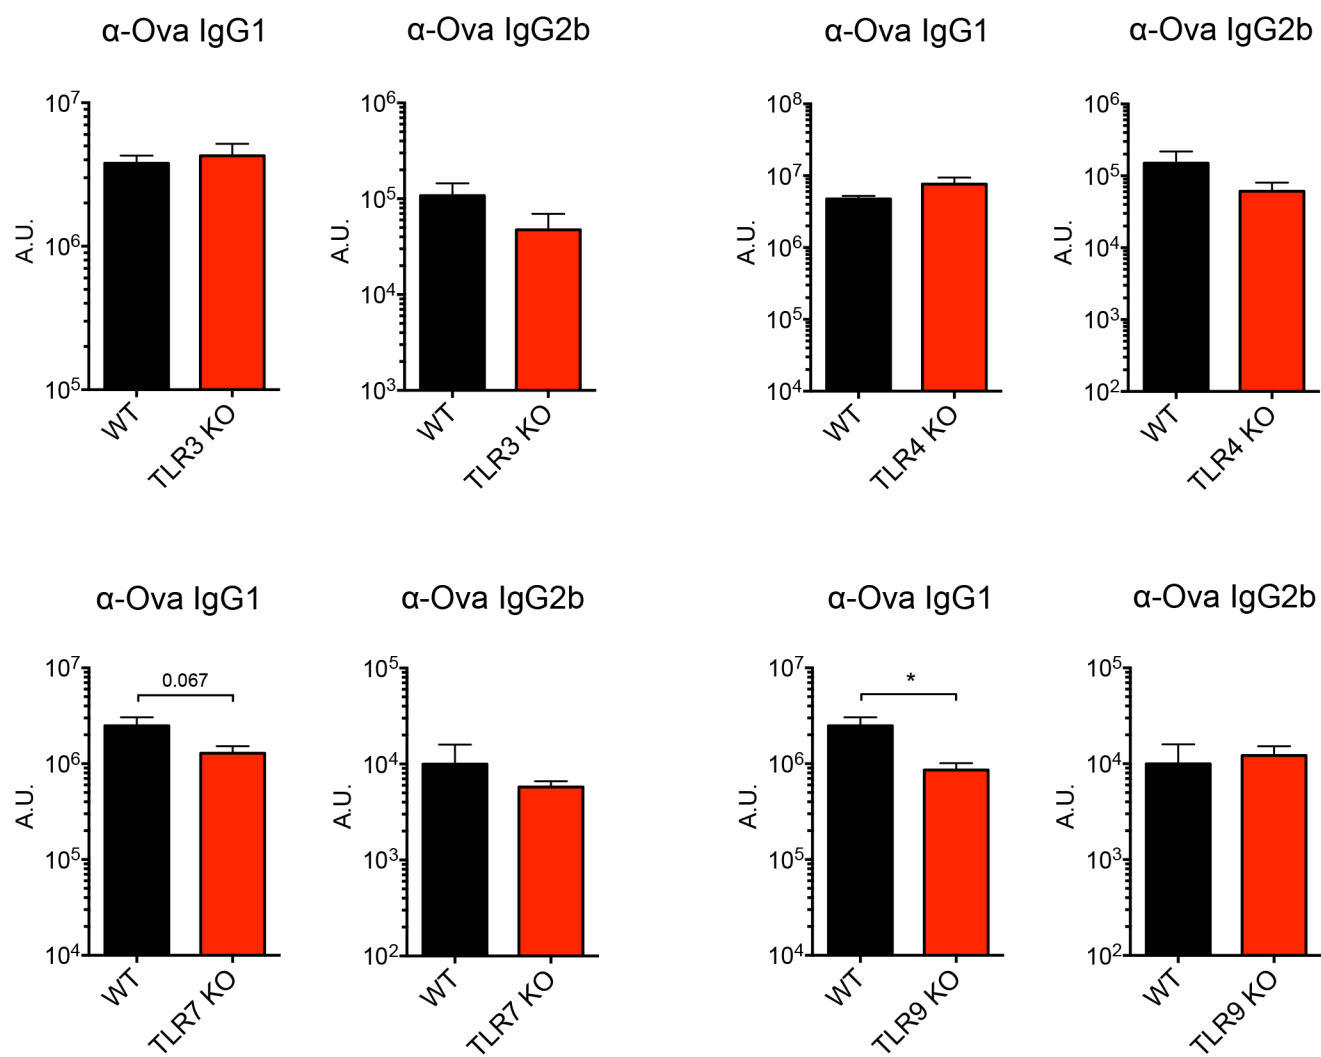**E**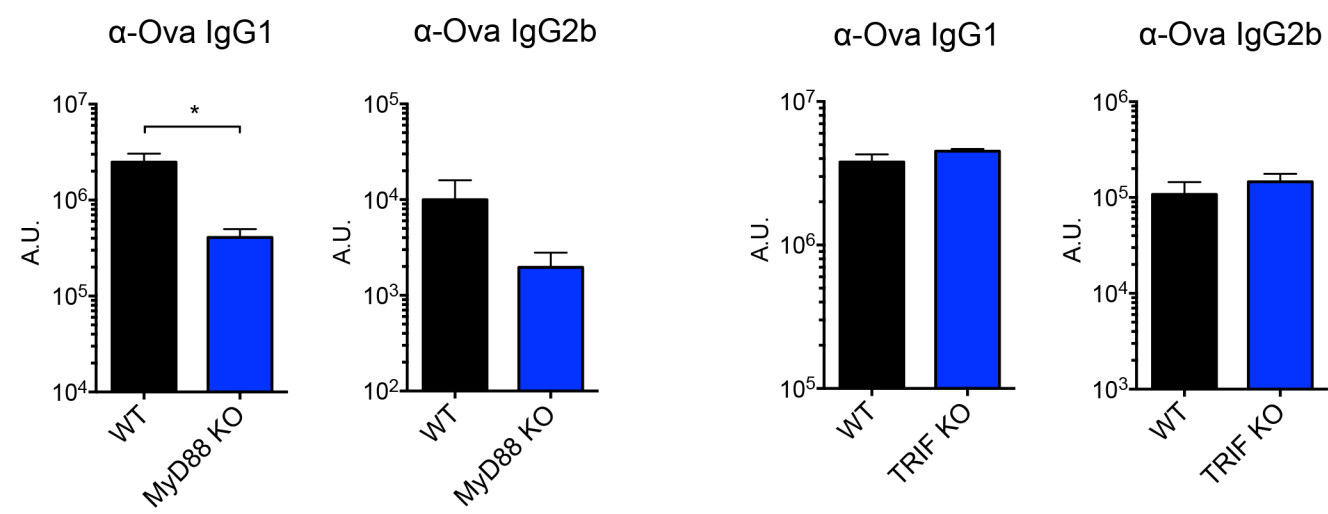

Supplement: supp [file elife_poa_e52687_Figure_7_figure_supplement_1.pdf › elife_poa_e52687_Figure_7_figure_supplement_1.pdf]
